# Supplementary material for: LINC00261 Suppresses Cisplatin Resistance of Esophageal Squamous Cell Carcinoma Through miR-545-3p/MT1M Axis
Source: Frontiers journal article supplement (doi:10.3389/fcell.2021.687788), 2021-07-15
Supplement: Table_1.DOCX [file Table_1.DOCX]

**TABLE1**

Primer sequences used for RT-qPCR

| Genes |  | Primer sequences (5’-3’) |
| --- | --- | --- |
| LINC00261 | Forward | GTCAGAAGGAAAGGCCGTGA |
|  | Reverse | TGAGCCGAGATGAACAGGTG |
| MT1M | Forward |  |
|  | Reverse |  |
| β-actin | Forward | AGCGAGCATCCCCCAAAGTT |
|  | Reverse | GGGCACGAAGGCTCATCATT |
| miR-545-3p | Forward | TGCGCTCAGCAAACATTTATTG |
|  | Reverse | CCAGTGCAGGGTCCGAGGTATT |
| U6 | Forward | CTCGCTTCGGCAGCACATATACTA |
|  | Reverse | ACGAATTTGCGTGTCATCCTTGCG |
